# Supplementary material for: CD200 facilitates the isolation of corneal epithelial cells derived from human pluripotent stem cells
Source: PubMed Central journal article supplement (PMC6224558; doi:10.1038/s41598-018-34845-2), 2018-11-08
Supplement: 41598_2018_34845_MOESM1_ESM.pdf [file 41598_2018_34845_MOESM1_ESM.pdf]

# **CD200 facilitates the isolation of corneal epithelial cells derived from human pluripotent stem cells**

Ryuhei Hayashi<sup>1,2\*</sup>, Yuki Ishikawa<sup>2</sup>, Tomohiko Katayama<sup>2</sup>, Andrew J. Quantock<sup>3</sup>, and Kohji Nishida<sup>2\*</sup>

<sup>1</sup> Department of Stem Cells and Applied Medicine, Osaka University Graduate School of Medicine, Suita, Osaka, 565-0871, Japan. <sup>2</sup> Department of Ophthalmology, Osaka University Graduate School of Medicine, Suita, Osaka, 565-0871, Japan. <sup>3</sup> Structural Biophysics Group, School of Optometry and Vision Sciences, College of Biomedical and Life Sciences, Cardiff University, Cardiff, CF24 4HQ, Wales, UK.

\*Corresponding to [ryuhei.hayashi@ophthal.med.osaka-u.ac.jp](mailto:ryuhei.hayashi@ophthal.med.osaka-u.ac.jp) and [knishida@ophthal.med.osaka-u.ac.jp](mailto:knishida@ophthal.med.osaka-u.ac.jp)

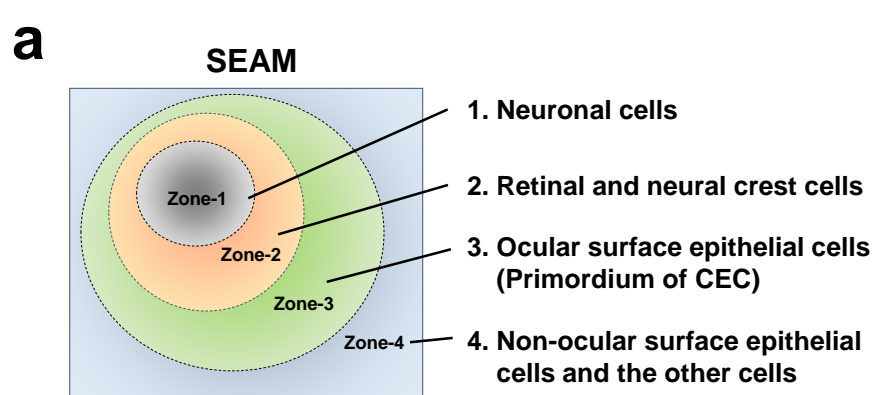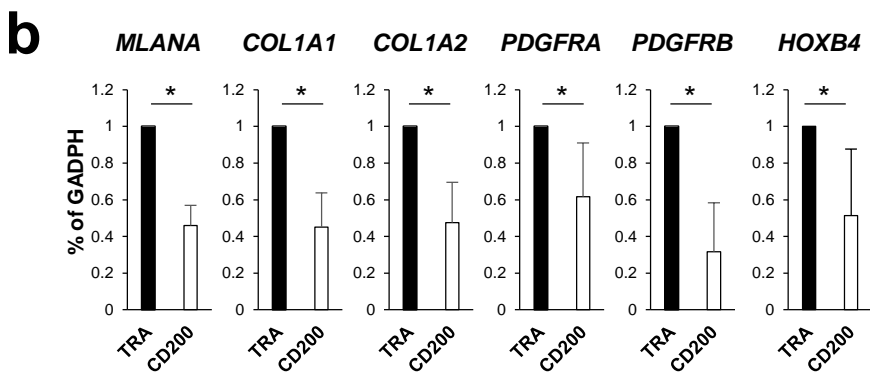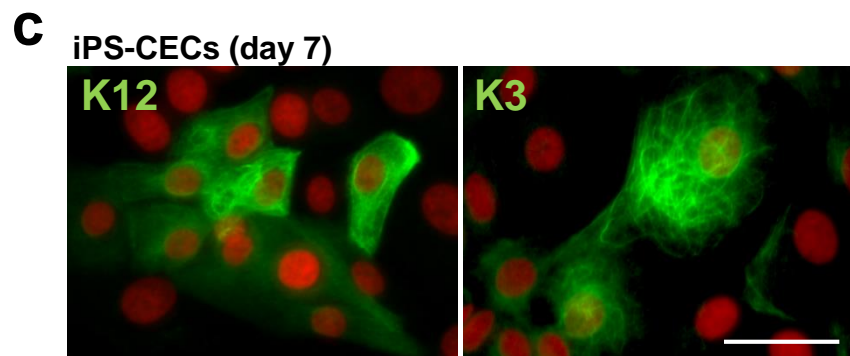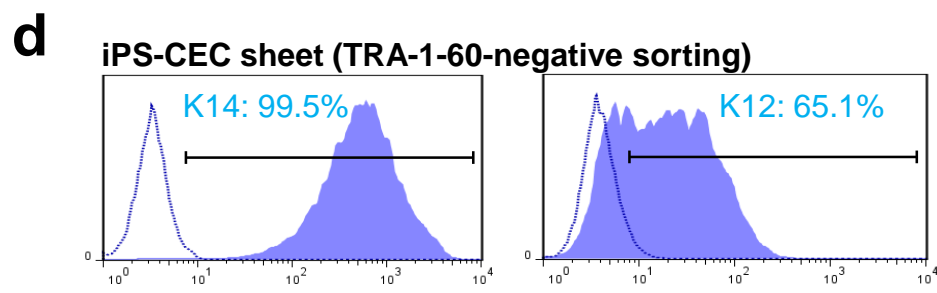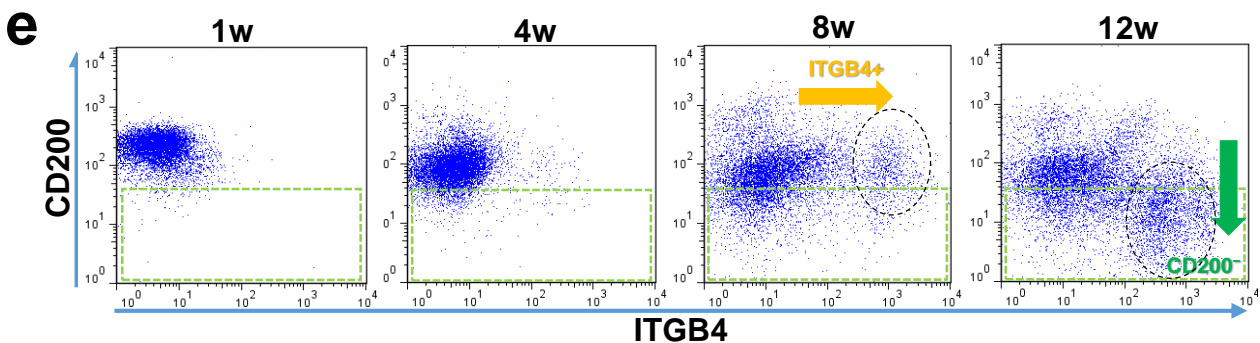

**Supplementary Figure S1**

**a****CD200**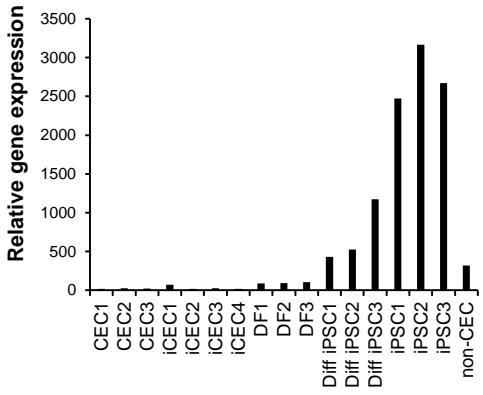**FGFR1**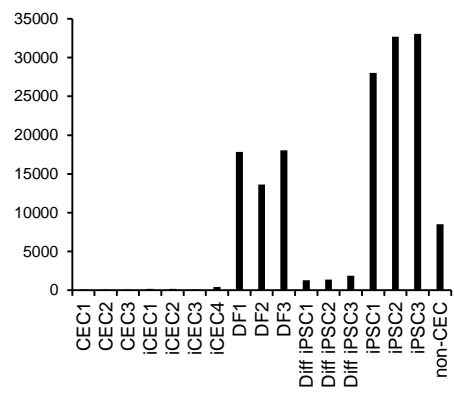**PDGFRB**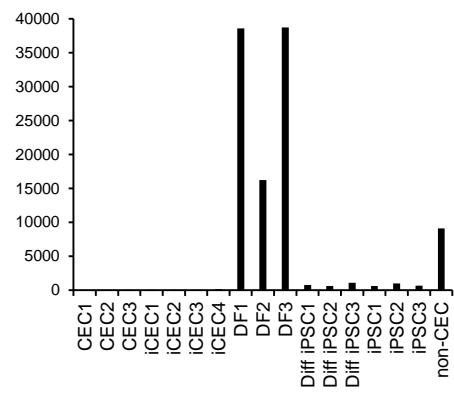

iCEC: iPSC-derived CECs,  
DF: Dermal fibroblasts,  
Diff iPSC: 6 weeks differentiated iPSCs  
non-CEC: Non-CEC colonies

| <b>Antigen</b>                 | <b>Description</b>                          |                                               |
|--------------------------------|---------------------------------------------|-----------------------------------------------|
| <b>K12</b>                     | Goat polyclonal; N-16                       | Santa Cruz Biotechnology, Santa Cruz, CA, USA |
| <b>K3</b>                      | Mouse monoclonal; AE5                       | PROGEN Biotechnik, Heidelberg, Germany        |
| <b>MUC16</b>                   | Mouse monoclonal; OV185:1                   | Abcam, Cambridge, MA, USA                     |
| <b>p63</b>                     | Mouse monoclonal; 4A4                       | Santa Cruz Biotechnology                      |
| <b>p40 (delta-N p63)</b>       | Rabbit polyclonal; API 3030 AA              | Biocare Medical, Concord CA                   |
| <b>K14</b>                     | Rabbit polyclonal; Poly19053                | Biolegend                                     |
| <b>K15</b>                     | Rabbit monoclonal; EPR1614Y                 | Abcam                                         |
| <b>K4</b>                      | Mouse monoclonal; 6B10                      | Abcam                                         |
| <b>K13</b>                     | Mouse monoclonal; AE8                       | Abcam                                         |
| <b>Pan-cytokeratin (K5/K8)</b> | Mouse monoclonal; FITC-conjugated           | PROGEN Biotechnik                             |
| <b>PAX6</b>                    | Rabbit polyclonal; PRB-278P                 | Covance Research Products, Denver, PA, USA    |
| <b>CD200</b>                   | Mouse monoclonal; OX-104 PE-conjugated      | Biolegend                                     |
| <b>CD200</b>                   | Goat polyclonal; AF2724 (for mouse tissues) | R&D systems, Minneapolis, MN, USA             |

## Supplementary Table S1

| <b>Target gene</b> | <b>Assay ID</b> |
|--------------------|-----------------|
| <i>GAPDH</i>       | Hs99999905_m1   |
| <i>PAX6</i>        | Hs00240871_m1   |
| <i>DN-p63</i>      | Hs00978339_m1   |
| <i>K3</i>          | Hs00365080_m1   |
| <i>K10</i>         | Hs00166289_m1   |
| <i>K12</i>         | Hs00165015_m1   |
| <i>K13</i>         | Hs00999762_m1   |
| <i>K18</i>         | Hs01941416_g1   |
| <i>CDH1</i>        | Hs01023894_m1   |
| <i>CDH2</i>        | Hs00983056_m1   |
| <i>CRYAA</i>       | Hs00166138_m1   |
| <i>18S</i>         | Hs99999901_s1   |
| <i>CD200</i>       | Hs01033303_m1   |
| <i>POU5F1</i>      | Hs00999632_g1   |
| <i>FGFR1</i>       | Hs00915142_m1   |
| <i>SOX2</i>        | Hs01053049_s1   |
| <i>SOX9</i>        | Hs00165814_m1   |
| <i>RPE65</i>       | Hs01071462_m1   |
| <i>TUBB3</i>       | Hs00801390_s1   |
| <i>VSX2</i>        | Hs01584047_m1   |
| <i>HOXA1</i>       | Hs00939046_m1   |
| <i>HOXB4</i>       | Hs00256884_m1   |
| <i>MLANA</i>       | Hs00194133_m1   |
| <i>COL1A1</i>      | Hs00164004_m1   |
| <i>COL1A2</i>      | Hs01028956_m1   |
| <i>PDGFRA</i>      | Hs00998018_m1   |
| <i>PDGFRB</i>      | Hs00182163_m1   |
| <i>RUNX1</i>       | Hs01021971_m1   |
| <i>AQP5</i>        | Hs00387048_m1   |

## Supplementary Table S2
